# Supplementary material for: Frequency of Egg Intake Associated with Mortality in Chinese Adults: An 8-Year Nationwide Cohort Study
Source: Int J Environ Res Public Health. 2022 Nov 10;19(22):14777. doi: 10.3390/ijerph192214777 (PMC9690384; doi:10.3390/ijerph192214777)
Supplement: Supplementary file 1 [file ijerph-19-14777-s001.zip › ijerph-1904837-supplementary.pdf]

# Supplementary Material

## Frequency of Egg Intake Associated with Mortality in Chinese Adults: An 8-Year Nationwide Cohort Study

Ke Wang <sup>1,†</sup>, Qianqian Xiang <sup>2,†</sup>, Lan Hu <sup>1,3</sup>, Lu Wang <sup>4,\*</sup>, Yunquan Zhang <sup>5,6,\*</sup>

<sup>1</sup> Department of Nursing, Medical College, Wuhan University of Science and Technology, Wuhan 430065, China

<sup>2</sup> Hubei Provincial Center for Disease Control and Prevention, Wuhan, 430079, China

<sup>3</sup> Department of Head and Neck Surgery, Hubei Cancer Hospital, Tongji Medical College, Huazhong University of Science and Technology, Wuhan 430079, Hubei, China

<sup>4</sup> School of Basic Medicine, Hubei University of Arts and Sciences, Xiang yang, Hubei 441053, China

<sup>5</sup> Department of Epidemiology and Biostatistics, School of Public Health, Wuhan University of Science and Technology, Wuhan 430065, China

<sup>6</sup> Hubei Province Key Laboratory of Occupational Hazard Identification and Control, Wuhan University of Science and Technology, Wuhan 430065, China

\*Corresponding author: Y. Zhang, Department of Epidemiology and Biostatistics, School of Public Health, Wuhan University of Science and Technology, Wuhan 430065, China. E-mail: [YunquanZhang@wust.edu.cn](mailto:YunquanZhang@wust.edu.cn)

\*Corresponding author: L. Wang, School of Basic Medicine, Hubei University of Arts and Sciences, Xiang yang, Hubei 441053, China. E-mail: [11706@hbuas.edu.cn](mailto:11706@hbuas.edu.cn)

<sup>†</sup> These authors contributed equally to this work.

Table of contents

**Figure S1.** Inclusion and exclusion flow chart of study sample.

**Table S1.** Association between egg consumption and mortality.

**Table S2.** Association between egg consumption and mortality in the CFPS after excluding cases of death that occurred within the first year of follow-up.

**Table S3.** Association between egg consumption and mortality in the CFPS after excluding cases aged less than 30 years.

**Table S4.** Association between egg consumption and mortality in the CFPS after excluding cases diagnosed with chronic disease at baseline.

## Figures

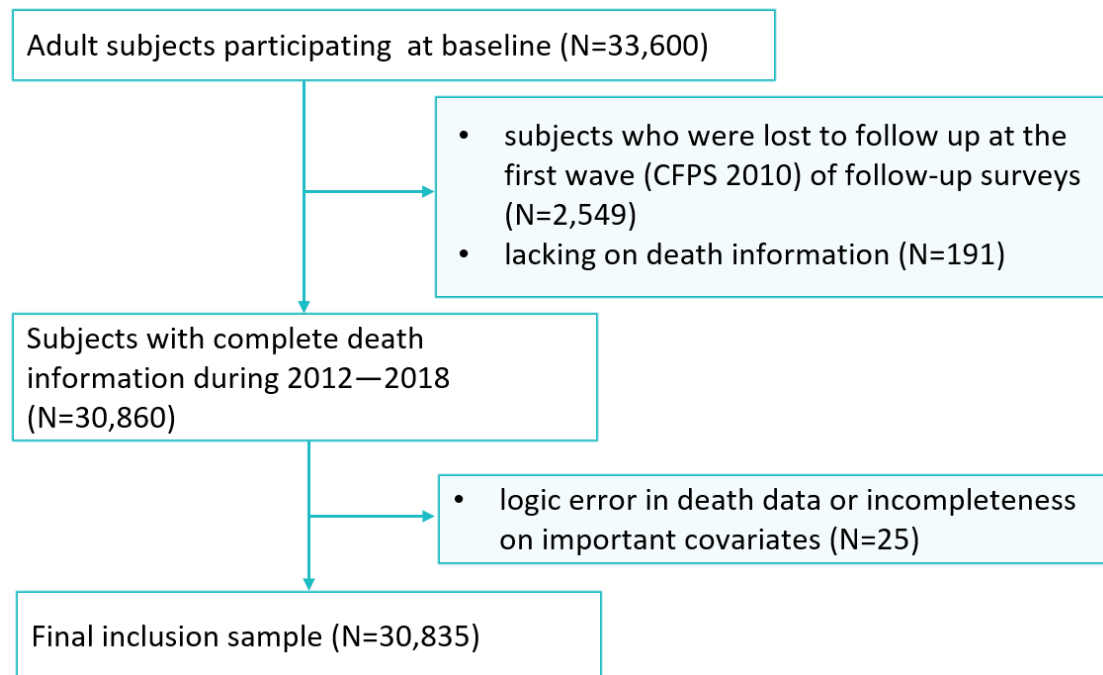

**Figure S1.** Inclusion and exclusion flow chart of study sample.

## Tables

**Table S1.** Association between egg consumption and mortality.

| Model   | Hazard ratio [95% CI] |                         |                         |                         | P for trend |
|---------|-----------------------|-------------------------|-------------------------|-------------------------|-------------|
|         | 0 times/week          | 1–2 times/week          | 3–6 times/week          | ≥7 times/week           |             |
| Model 1 | 1(Ref)                | 0.77 [0.68 to 0.88] *** | 0.64 [0.56 to 0.73] *** | 0.66 [0.57 to 0.77] *** | <0.001      |
| Model 2 | 1(Ref)                | 0.85 [0.74 to 0.96] **  | 0.72 [0.63 to 0.82] *** | 0.69 [0.59 to 0.81] *** | <0.001      |
| Model 3 | 1(Ref)                | 0.95 [0.82 to 1.10]     | 0.84 [0.72 to 0.97] *   | 0.82 [0.69 to 0.98] *   | 0.007       |

Model 1: Unadjusted.

Model 2: Model 1 + age +gender.

Model 3: Model 2 + BMI, ethnicity, residential region, annual house-hold income, physical activity, smoking status, alcohol drinking, chronic disease, meat intake, vegetable intake, fish, dairy products.

Notes: \*p < 0.05; \*\*p < 0.01; \*\*\*p < 0.001.

**Table S2.** Association between egg consumption and mortality in the CFPS after excluding cases of death that occurred within the first year of follow-up.

| Model   | Hazard ratio [95% CI] |                         |                         |                         | P for trend |
|---------|-----------------------|-------------------------|-------------------------|-------------------------|-------------|
|         | 0 times/week          | 1–2 times/week          | 3–6 times/week          | ≥7 times/week           |             |
| Model 1 | 1(Ref)                | 0.77 [0.68 to 0.88] *** | 0.64 [0.56 to 0.73] *** | 0.66 [0.57 to 0.77] *** | <0.001      |
| Model 2 | 1(Ref)                | 0.85 [0.74 to 0.96] **  | 0.72 [0.63 to 0.82] *** | 0.69 [0.59 to 0.81] *** | <0.001      |
| Model 3 | 1(Ref)                | 0.96 [0.83 to 1.11]     | 0.84 [0.72 to 0.97] *   | 0.83 [0.70 to 0.99] *   | 0.007       |

Model 1: Unadjusted.

Model 2: Model 1 + age +gender.

Model 3: Model 2 + BMI, ethnicity, residential region, annual house-hold income, physical activity, smoking status, alcohol drinking, chronic disease, meat intake, vegetable intake, fish, dairy products.

Notes: \*p < 0.05; \*\*p < 0.01; \*\*\*p < 0.001.

**Table S3.** Association between egg consumption and mortality in the CFPS after excluding cases aged less than 30 years.

| Model   | Hazard ratio [95% CI] |                         |                         |                         | P for trend |
|---------|-----------------------|-------------------------|-------------------------|-------------------------|-------------|
|         | 0 times/week          | 1–2 times/week          | 3–6 times/week          | ≥7 times/week           |             |
| Model 1 | 1(Ref)                | 0.78 [0.69 to 0.89] *** | 0.67 [0.58 to 0.76] *** | 0.69 [0.59 to 0.80] *** | <0.001      |
| Model 2 | 1(Ref)                | 0.86 [0.77 to 0.97] *   | 0.82 [0.73 to 0.92] **  | 0.89 [0.78 to 1.01]     | <0.001      |
| Model 3 | 1(Ref)                | 0.83 [0.73 to 0.94] **  | 0.79 [0.69 to 0.89] *** | 0.82 [0.71 to 0.95] **  | 0.005       |

Model 1: Unadjusted.

Model 2: Model 1 + age +gender.

Model 3: Model 2 + BMI, ethnicity, residential region, annual house-hold income, physical activity, smoking status, alcohol drinking, chronic disease, meat intake, vegetable intake, fish, dairy products.

Notes: \*p < 0.05; \*\*p < 0.01; \*\*\*p < 0.001.

**Table S4.** Association between egg consumption and mortality in the CFPS after excluding cases diagnosed with chronic disease at baseline.

| Model   | Hazard ratio [95% CI] |                         |                         |                         | P for trend |
|---------|-----------------------|-------------------------|-------------------------|-------------------------|-------------|
|         | 0 times/week          | 1–2 times/week          | 3–6 times/week          | ≥7 times/week           |             |
| Model 1 | 1(Ref)                | 0.75 [0.65 to 0.87] *** | 0.62 [0.53 to 0.72] *** | 0.58 [0.48 to 0.69] *** | <0.001      |
| Model 2 | 1(Ref)                | 0.84 [0.72 to 0.97] *   | 0.71 [0.61 to 0.83] *** | 0.62 [0.52 to 0.75] *** | <0.001      |
| Model 3 | 1(Ref)                | 0.95 [0.81 to 1.12]     | 0.84 [0.71 to 0.99] *   | 0.76 [0.62 to 0.93] **  | 0.003       |

Model 1: Unadjusted.

Model 2: Model 1 + age +gender.

Model 3: Model 2 + BMI, ethnicity, residential region, annual house-hold income, physical activity, smoking status, alcohol drinking, chronic disease, meat intake, vegetable intake, fish, dairy products.

Notes: \*p < 0.05; \*\*p < 0.01; \*\*\*p < 0.001.
